# Supplementary material
Source: ML conference proceedings conference paper supplement (https://www.ecva.net/papers/eccv_2022/papers_ECCV/html/136690380_ECCV_2022_paper.php)
Supplement: Supplementary file 2 [file 136690380-supp.zip]

Archive with 2 entries (2 files):
- 2691-supp-video.mp4
- 2691-supp.pdf
